# Supplementary material for: Short Tandem Repeat Genotyping and Antifungal Susceptibility Testing of Latin American Candida tropicalis Isolates
Source: MDPI journal article supplement (doi:10.3390/jof9020207), 2023-02-05
Supplement: s1 [file s1]

**Table S1: Overview of all *C. tropicalis* isolates, including AFST MICs according to microbroth dilutions CLSI M27-S4 standard and clinical details. Gt, genotype; FLC, fluconazole; VRC, voriconazole; AMB, amphotericin B; AFG, anidulafungin; ICU, intensive care unit**

| ID          | Country   | City           | Hospital (#)   | Hospital unit             | Collection site*  | Year of isolation | Gt | FLC   | VRC  | AMB   | AFG  |
|-------------|-----------|----------------|----------------|---------------------------|-------------------|-------------------|----|-------|------|-------|------|
| 1150/2016   | Brazil    | Londrina       | 1              | Unknown                   | Blood culture     | 2016              | 1  | 1     | 0.03 | 0.5   | 0.03 |
| 1153/2016   | Brazil    | Londrina       | 1              | Unknown                   | Blood culture     | 2016              | 2  | 2     | 0.03 | 0.5   | 0.03 |
| CMRP5544    | Brazil    | Curitiba       | 2              | Unknown                   | Blood culture     | 2022              | 3  | 1     | 0.03 | 0.5   | 0.06 |
| 1557/2020   | Brazil    | Salvador       | 3              | Pediatric ICU             | Blood culture     | 2019              | 4  | 0.25  | 0.03 | 0.25  | 0.03 |
| 1559/2020   | Brazil    | Salvador       | 3              | Pediatric ICU             | Blood culture     | 2019              | 4  | 0.25  | 0.03 | 0.5   | 0.03 |
| 1681/2020   | Brazil    | Salvador       | 3              | ICU II immune-compromised | Blood culture     | 2020              | 4  | 1     | 0.03 | 0.5   | 0.03 |
| 8295/2011   | Brazil    | Porto Alegre   | 4              | Surgery                   | Blood culture     | 2011              | 5  | 0.5   | 0.06 | 0.25  | 0.03 |
| 7394A/2011  | Brazil    | Belo Horizonte | 5              | General ICU               | Blood culture     | 2011              | 6  | 0.125 | 0.03 | 0.25  | 0.03 |
| 1189/2020   | Brazil    | São Paulo      | 6              | Unknown                   | Blood culture     | 2020              | 7  | 0.125 | 0.03 | 0.5   | 0.03 |
| 1248A/2016  | Brazil    | Londrina       | 7              | Unknown                   | Blood culture     | 2016              | 8  | 0.125 | 0.03 | 0.5   | 0.03 |
| 8083/2011   | Brazil    | Curitiba       | 2              | Emergency                 | Blood culture     | 2011              | 9  | 0.25  | 0.03 | 0.25  | 0.03 |
| 8088/2011   | Brazil    | Curitiba       | 2              | Surgery                   | Blood culture     | 2011              | 10 | 0.25  | 0.03 | 0.25  | 0.03 |
| 7052/2010   | Colombia  | Bogotá         | 8              | Unknown                   | Blood culture     | 2010              | 11 | 0.25  | 0.03 | 0.05  | 0.06 |
| 7053/2010   | Colombia  | Bogotá         | 8              | Unknown                   | Blood culture     | 2010              | 12 | 0.25  | 0.03 | 1     | 0.06 |
| 291/2018    | Colombia  | Medellín       | 9              | Unknown                   | Blood culture     | 2018              | 13 | 8     | 0.25 | 0.5   | 0.03 |
| 6988/2010   | LATAM     | Unknown        | 10             | Unknown                   | Blood culture     | 2010              | 14 | 0.125 | 0.03 | 1     | 0.03 |
| CMRP5546    | Brazil    | Curitiba       | 2              | Unknown                   | Blood culture     | 2022              | 15 | 0.25  | 0.03 | 0.5   | 0.06 |
| CMRP5548    | Brazil    | Curitiba       | 2              | Unknown                   | Blood culture     | 2022              | 16 | 0.125 | 0.03 | 1     | 0.03 |
| CMRP5552    | Brazil    | Curitiba       | 2              | Unknown                   | Blood culture     | 2022              | 17 | 0.5   | 0.06 | 0.5   | 0.06 |
| CMRP5542    | Brazil    | Curitiba       | 2              | Unknown                   | Blood culture     | 2022              | 18 | 0.25  | 0.03 | 0.25  | 0.03 |
| 8078/2011   | Brazil    | São Paulo      | 11             | Surgical ICU              | Blood culture     | 2011              | 19 | 0.125 | 0.03 | 0.5   | 0.03 |
| 1737/2017   | Brazil    | Rio de Janeiro | 12             | Unknown                   | Blood culture     | 2017              | 20 | 0.125 | 0.03 | 0.25  | 0.03 |
| 7083/2010   | Brazil    | Curitiba       | 2              | Unknown                   | Blood culture     | 2010              | 21 | 0.25  | 0.03 | 0.5   | 0.03 |
| 7232B/2010  | Brazil    | Curitiba       | 2              | Unknown                   | Blood culture     | 2010              | 21 | 0.25  | 0.06 | 1     | 0.06 |
| 7459A/2011  | Brazil    | Salvador       | 3              | Coronary Unit ICU         | Blood culture     | 2011              | 22 | 0.125 | 0.03 | 0.5   | 0.03 |
| 167/2019    | Brazil    | São Paulo      | 3              | Medical clinical ICU      | Blood culture     | 2019              | 23 | 0.25  | 0.03 | 0.25  | 0.03 |
| 168/2019    | Brazil    | São Paulo      | 3              | Medical clinical ICU      | Blood culture     | 2019              | 23 | 0.25  | 0.03 | 0.5   | 0.03 |
| 1877/2021   | Brazil    | São Paulo      | 6              | Unknown                   | Blood culture     | 2021              | 23 | 0.125 | 0.03 | 0.5   | 0.03 |
| 1741A0/2017 | Brazil    | Rio de Janeiro | 12             | Unknown                   | Blood culture     | 2013              | 24 | 0.125 | 0.03 | 0.25  | 0.03 |
| 1741B0/2017 | Brazil    | Rio de Janeiro | 12             | Unknown                   | Blood culture     | 2013              | 24 | 0.125 | 0.03 | 0.5   | 0.03 |
| 510/2019    | Brazil    | São Paulo      | 13             | Unknown                   | Blood culture     | 2018              | 25 | 0.125 | 0.03 | 0.25  | 0.03 |
| 1734B0/2017 | Brazil    | Rio de Janeiro | 12             | Unknown                   | Blood culture     | 2011              | 26 | 0.125 | 0.03 | 0.5   | 0.03 |
| 1735C0/2017 | Brazil    | Rio de Janeiro | 12             | Unknown                   | Blood culture     | 2011              | 26 | 0.125 | 0.03 | 0.5   | 0.03 |
| 483/2019    | Brazil    | Curitiba       | 2              | Surgical nursery          | Blood culture     | 2018              | 27 | 0.125 | 0.03 | 0.25  | 0.03 |
| 284/2015    | Brazil    | São Paulo      | 3              | ICU UPOCC                 | Catheter blood    | 2015              | 28 | 0.125 | 0.03 | 0.5   | 0.03 |
| 301/2015    | Brazil    | São Paulo      | 3              | ICU burn unit             | Blood culture     | 2015              | 28 | 0.125 | 0.03 | 0.5   | 0.03 |
| 1381/2020   | Brazil    | São Paulo      | 3              | General ICU Adult II      | Blood culture     | 2020              | 29 | 0.125 | 0.03 | 0.5   | 0.03 |
| 305/2015    | Brazil    | São Paulo      | 6              | Unknown                   | Blood culture     | 2015              | 30 | 0.125 | 0.03 | 0.5   | 0.03 |
| 1443/2017   | Brazil    | Natal          | Non applicable | Non applicable            | Ponta Negra beach | 2017              | 31 | 1     | 0.06 | 0.5   | 0.03 |
| 6685/2010   | Brazil    | Rio de Janeiro | 15             | Unknown                   | Blood culture     | 2010              | 32 | 0.25  | 0.03 | 0.5   | 0.03 |
| 7048/2010   | Colombia  | Bogotá         | 16             | Unknown                   | Blood culture     | 2010              | 33 | 0.5   | 0.06 | 0.25  | 0.03 |
| 486/2018    | Brazil    | São Paulo      | 3              | ICU burn unit             | Blood culture     | 2018              | 34 | 0.125 | 0.03 | 0.5   | 0.03 |
| 8080A/2011  | Brazil    | São Paulo      | 11             | Pediatric ICU             | Blood culture     | 2011              | 35 | 0.125 | 0.03 | 0.5   | 0.03 |
| 8080C/2011  | Brazil    | São Paulo      | 11             | Pediatric ICU             | Blood culture     | 2011              | 35 | 0.25  | 0.03 | 0.125 | 0.03 |
| 780/2019    | Brazil    | Rio de Janeiro | 15             | Unknown                   | Blood culture     | 2018              | 36 | 0.125 | 0.03 | 0.5   | 0.03 |
| 8142/2011   | Argentina | Buenos Aires   | 17             | Unknown                   | Blood culture     | 2010              | 37 | 0.125 | 0.03 | 0.5   | 0.03 |
| 8146A/2011  | Argentina | Buenos Aires   | 17             | Unknown                   | Blood culture     | 2010              | 37 | 0.125 | 0.03 | 0.5   | 0.03 |

|             |           |                |    |                                  |                |      |    |       |       |       |      |
|-------------|-----------|----------------|----|----------------------------------|----------------|------|----|-------|-------|-------|------|
| 8146B/2011  | Argentina | Buenos Aires   | 17 | Unknown                          | Blood culture  | 2010 | 37 | 0.125 | 0.03  | 0.5   | 0.06 |
| 8141/2011   | Argentina | Buenos Aires   | 17 | Unknown                          | Blood culture  | 2010 | 37 | 0.125 | 0.03  | 0.25  | 0.03 |
| 1178/2020   | Brazil    | São Paulo      | 18 | Unknown                          | Blood culture  | 2020 | 38 | 0.125 | 0.03  | 0.5   | 0.03 |
| 1179/2020   | Brazil    | São Paulo      | 18 | Unknown                          | Catheter blood | 2020 | 38 | 0.25  | 0.03  | 0.5   | 0.03 |
| 491/2018    | Brazil    | São Paulo      | 6  | Unknown                          | Blood culture  | 2018 | 39 | 0.125 | 0.03  | 0.5   | 0.03 |
| 1883/2021   | Brazil    | São Paulo      | 19 | Orthopedics ICU                  | Blood culture  | 2021 | 40 | 0.125 | 0.03  | 0.5   | 0.03 |
| 8893/2012   | Brazil    | São Paulo      | 6  | Unknown                          | Blood culture  | 2012 | 41 | 0.25  | 0.03  | 0.5   | 0.06 |
| 8921E/2012  | Brazil    | São Paulo      | 6  | Unknown                          | Blood culture  | 2012 | 41 | 0.25  | 0.03  | 0.125 | 0.03 |
| 10105/2014  | Brazil    | São Paulo      | 6  | Unknown                          | Blood culture  | 2014 | 42 | 0.125 | 0.03  | 0.5   | 0.06 |
| 630/2019    | Brazil    | São Paulo      | 19 | General ICU                      | Blood culture  | 2017 | 43 | 0.125 | 0.03  | 0.5   | 0.03 |
| 6336A/2010  | Brazil    | São Paulo      | 3  | Medical clinical ICU             | Blood culture  | 2010 | 44 | 0.125 | 0.03  | 1     | 0.03 |
| 6336B/2010  | Brazil    | São Paulo      | 3  | Medical clinical ICU             | Catheter blood | 2010 | 44 | 0.25  | 0.03  | 1     | 0.06 |
| 7809/2011   | Brazil    | São Paulo      | 11 | Pediatric ICU                    | Blood culture  | 2011 | 45 | 0.25  | 0.03  | 0.5   | 0.03 |
| 722/2019    | Brazil    | Porto Alegre   | 4  | Surgical nursery                 | Blood culture  | 2018 | 46 | 0.125 | 0.03  | 0.25  | 0.03 |
| 298/2018    | Colombia  | Medellín       | 9  | Unknown                          | Blood culture  | 2018 | 47 | 0.25  | 0.06  | 0.5   | 0.06 |
| 228/2015    | Brazil    | São Paulo      | 6  | Unknown                          | Blood culture  | 2015 | 48 | 1     | 0.03  | 0.5   | 0.03 |
| 1753/2017   | Brazil    | Rio de Janeiro | 12 | Unknown                          | Blood culture  | 2015 | 49 | 0.125 | 0.03  | 0.5   | 0.03 |
| 297/2018    | Colombia  | Medellín       | 9  | Unknown                          | Blood culture  | 2018 | 50 | 2     | 0.125 | 1     | 0.03 |
| 299/2018    | Colombia  | Medellín       | 9  | Unknown                          | Blood culture  | 2018 | 51 | 1     | 0.125 | 1     | 0.03 |
| 9262/2013   | Brazil    | São Paulo      | 3  | ICU adult first aid              | Blood culture  | 2013 | 52 | 0.5   | 0.06  | 1     | 0.06 |
| 9274A/2013  | Brazil    | São Paulo      | 3  | General ICU adult                | Blood culture  | 2013 | 52 | 0.5   | 0.06  | 1     | 0.06 |
| 9274B/2013  | Brazil    | São Paulo      | 3  | General ICU adult                | Catheter blood | 2013 | 52 | 0.5   | 0.06  | 1     | 0.06 |
| 9275B/2013  | Brazil    | São Paulo      | 6  | Unknown                          | Blood culture  | 2013 | 53 | 0.25  | 0.03  | 0.5   | 0.03 |
| 9275C/2013  | Brazil    | São Paulo      | 6  | Unknown                          | Blood culture  | 2013 | 53 | 0.5   | 0.03  | 0.5   | 0.03 |
| 1761/2017   | Brazil    | Rio de Janeiro | 12 | Unknown                          | Blood culture  | 2016 | 54 | 0.25  | 0.03  | 1     | 0.03 |
| 745/2019    | Brazil    | Porto Alegre   | 4  | Unknown                          | Blood culture  | 2017 | 55 | 0.125 | 0.03  | 0.5   | 0.03 |
| 8068/2011   | Brazil    | Curitiba       | 20 | Emergency                        | Blood culture  | 2010 | 56 | 0.125 | 0.03  | 0.5   | 0.03 |
| 1110/2016   | Brazil    | São Paulo      | 18 | Unknown                          | Catheter blood | 2016 | 57 | 0.25  | 0.03  | 0.5   | 0.03 |
| 7550A/2011  | Brazil    | Curitiba       | 21 | Medical clinic                   | Blood culture  | 2010 | 58 | 0.125 | 0.03  | 0.5   | 0.03 |
| 339/2019    | Brazil    | São Paulo      | 6  | Unknown                          | Blood culture  | 2019 | 59 | 0.125 | 0.03  | 0.5   | 0.03 |
| 963/2019    | Brazil    | São Paulo      | 3  | ICU adult first aid              | Catheter blood | 2019 | 59 | 0.125 | 0.03  | 0.5   | 0.03 |
| 7013/2010   | Colombia  | Bogotá         | 22 | Unknown                          | Blood culture  | 2010 | 60 | 0.125 | 0.03  | 1     | 0.03 |
| 7043/2010   | Colombia  | Bogotá         | 22 | Unknown                          | Blood culture  | 2010 | 60 | 0.125 | 0.03  | 1     | 0.03 |
| 1754/2017   | Brazil    | Rio de Janeiro | 12 | Unknown                          | Blood culture  | 2015 | 61 | 0.25  | 0.03  | 0.5   | 0.03 |
| 2240/2021   | Brazil    | São Paulo      | 3  | General ICU adult II             | Blood culture  | 2021 | 62 | 0.125 | 0.03  | 0.5   | 0.03 |
| 2241/2021   | Brazil    | São Paulo      | 3  | General ICU adult II             | Blood culture  | 2021 | 62 | 0.125 | 0.03  | 0.25  | 0.03 |
| CMRP5554    | Brazil    | Curitiba       | 2  | Unknown                          | Blood culture  | 2022 | 63 | 0.125 | 0.03  | 0.5   | 0.03 |
| CMRP5551    | Brazil    | Curitiba       | 2  | Unknown                          | Blood culture  | 2022 | 64 | 0.25  | 0.03  | 0.25  | 0.03 |
| 2017/2021   | Brazil    | São Paulo      | 3  | Observation unit adult first aid | Blood culture  | 2021 | 65 | 0.5   | 0.03  | 0.25  | 0.03 |
| 310/2018    | Brazil    | São Paulo      | 18 | Unknown                          | Catheter blood | 2018 | 66 | 0.125 | 0.03  | 0.5   | 0.03 |
| 335/2018    | Brazil    | São Paulo      | 18 | Unknown                          | Catheter blood | 2018 | 66 | 0.125 | 0.03  | 0.5   | 0.03 |
| 91/2019     | Brazil    | São Paulo      | 18 | Unknown                          | Blood culture  | 2019 | 67 | 0.25  | 0.03  | 0.5   | 0.06 |
| 92/2019     | Brazil    | São Paulo      | 8  | Unknown                          | Blood culture  | 2019 | 67 | 0.25  | 0.03  | 0.5   | 0.03 |
| 139/2015    | Brazil    | São Paulo      | 3  | IU gastrosurgery                 | Blood culture  | 2015 | 68 | 2     | 0.125 | 1     | 0.06 |
| 141/2015    | Brazil    | São Paulo      | 3  | IU gastrosurgery                 | Blood culture  | 2015 | 68 | 0.5   | 0.06  | 0.5   | 0.06 |
| 178/2015    | Brazil    | São Paulo      | 3  | IU gastrosurgery                 | Blood culture  | 2015 | 68 | 0.5   | 0.06  | 1     | 0.06 |
| 340/2019    | Brazil    | São Paulo      | 18 | Unknown                          | Blood culture  | 2019 | 69 | 0.25  | 0.03  | 0.5   | 0.03 |
| 360/2019    | Brazil    | São Paulo      | 18 | Unknown                          | Blood culture  | 2019 | 69 | 0.25  | 0.03  | 0.5   | 0.03 |
| 1752B0/2017 | Brazil    | Rio de Janeiro | 12 | Unknown                          | Blood culture  | 2017 | 70 | 0.25  | 0.03  | 0.5   | 0.03 |
| 1752C0/2017 | Brazil    | Rio de Janeiro | 12 | Unknown                          | Blood culture  | 2017 | 70 | 0.25  | 0.03  | 0.5   | 0.03 |
| 2196/2021   | Brazil    | São Paulo      | 3  | General ICU adult II             | Blood culture  | 2021 | 71 | 0.5   | 0.03  | 1     | 0.03 |

|             |          |                |                |                        |                   |      |     |       |       |      |       |
|-------------|----------|----------------|----------------|------------------------|-------------------|------|-----|-------|-------|------|-------|
| 1922/2017   | Brazil   | São Paulo      | 3              | Medical clinical ICU   | Blood culture     | 2017 | 72  | 0.25  | 0.03  | 0.5  | 0.03  |
| 7244A/2010  | Brazil   | Curitiba       | 2              | Unknown                | Blood culture     | 2010 | 73  | 0.125 | 0.03  | 0.5  | 0.03  |
| 7244C/2010  | Brazil   | Curitiba       | 2              | Unknown                | Blood culture     | 2010 | 73  | 0.25  | 0.03  | 1    | 0.06  |
| 7258A/2010  | Brazil   | Curitiba       | 2              | Pediatric infection    | Blood culture     | 2010 | 73  | 0.25  | 0.03  | 0.5  | 0.03  |
| 7619/2011   | Brazil   | Porto Alegre   | 4              | Medical clinic         | Blood culture     | 2010 | 73  | 0.5   | 0.06  | 0.5  | 0.03  |
| 241/2019    | Brazil   | São Paulo      | 3              | ICU pediatrics         | Blood culture     | 2019 | 74  | 0.125 | 0.03  | 0.5  | 0.03  |
| 1135/2016   | Brazil   | Curitiba       | 23             | Unknown                | Blood culture     | 2016 | 75  | 0.125 | 0.03  | 0.5  | 0.03  |
| 1760A0/2017 | Brazil   | Rio de Janeiro | 12             | Unknown                | Blood culture     | 2015 | 76  | 0.25  | 0.03  | 0.5  | 0.03  |
| 295/2018    | Colombia | Medellín       | 9              | Unknown                | Blood culture     | 2018 | 77  | 0.5   | 0.125 | 1    | 0.06  |
| 296/2018    | Colombia | Medellín       | 9              | Unknown                | Blood culture     | 2018 | 78  | 0.25  | 0.06  | 1    | 0.06  |
| 7445/2011   | Brazil   | São Paulo      | 3              | Surgery                | Blood culture     | 2011 | 79  | 0.125 | 0.03  | 0.5  | 0.03  |
| 292/2018    | Colombia | Medellín       | 9              | Unknown                | Blood culture     | 2018 | 80  | 1     | 0.03  | 1    | 0.03  |
| 7120/2010   | Brazil   | São Paulo      | 11             | Surgical ICU           | Blood culture     | 2010 | 81  | 0.25  | 0.03  | 1    | 0.03  |
| 7806/2011   | Brazil   | São Paulo      | 11             | Surgical ICU           | Blood culture     | 2011 | 81  | 0.25  | 0.03  | 0.5  | 0.03  |
| 1742/2017   | Brazil   | Rio de Janeiro | 12             | Unknown                | Blood culture     | 2014 | 82  | 0.25  | 0.03  | 0.5  | 0.03  |
| 103/2019    | Brazil   | São Paulo      | 13             | Surgical ICU           | Blood culture     | 2017 | 83  | 0.25  | 0.03  | 0.25 | 0.03  |
| 1076/2016   | Brazil   | São Paulo      | 6              | Unknown                | Catheter blood    | 2016 | 84  | 0.5   | 0.06  | 0.25 | 0.03  |
| 105/2015    | Brazil   | São Paulo      | 18             | Unknown                | Blood culture     | 2015 | 85  | 0.125 | 0.03  | 0.5  | 0.06  |
| 1890/2021   | Brazil   | São Paulo      | 3              | General ICU adult      | Blood culture     | 2021 | 86  | 0.125 | 0.03  | 0.5  | 0.03  |
| CMRP5550    | Brazil   | Curitiba       | 2              | Unknown                | Blood culture     | 2022 | 87  | 0.125 | 0.06  | 0.25 | 0.03  |
| 1349/2016   | Brazil   | São Paulo      | 18             | Unknown                | Blood culture     | 2016 | 88  | 0.25  | 0.03  | 0.5  | 0.03  |
| 560/2019    | Brazil   | São Paulo      | 19             | Medical ICU            | Blood culture     | 2017 | 89  | 0.125 | 0.03  | 0.5  | 0.03  |
| 2145/2021   | Brazil   | São Paulo      | 18             | Unknown                | Catheter blood    | 2021 | 90  | 0.125 | 0.03  | 0.5  | 0.03  |
| 7416/2011   | Brazil   | São Paulo      | 11             | General ICU            | Catheter blood    | 2010 | 91  | 4     | 0.25  | 1    | 0.125 |
| 915/2019    | Brazil   | São Paulo      | 24             | General ICU            | Blood culture     | 2018 | 92  | 0.125 | 0.03  | 1    | 0.06  |
| 7225/2010   | Brazil   | Curitiba       | 2              | Unknown                | Blood culture     | 2010 | 93  | 4     | 0.25  | 0.5  | 0.03  |
| 293/2018    | Colombia | Medellín       | 9              | Unknown                | Blood culture     | 2018 | 94  | 0.25  | 0.03  | 1    | 0.03  |
| 294/2018    | Colombia | Medellín       | 9              | Unknown                | Blood culture     | 2018 | 94  | 0.125 | 0.03  | 1    | 0.06  |
| 1450/2017   | Brazil   | Natal          | Non applicable | Non applicable         | Ponta Negra beach | 2017 | 95  | 4     | 0.25  | 1    | 0.06  |
| 1452/2017   | Brazil   | Natal          | Non applicable | Non applicable         | Ponta Negra beach | 2017 | 96  | 4     | 0.25  | 1    | 0.06  |
| 1453/2017   | Brazil   | Natal          | Non applicable | Non applicable         | Ponta Negra beach | 2017 | 96  | 4     | 0.25  | 1    | 0.06  |
| 1463/2017   | Brazil   | Natal          | Non applicable | Non applicable         | Ponta Negra beach | 2017 | 96  | 4     | 0.25  | 1    | 0.06  |
| 1483/2017   | Brazil   | Natal          | Non applicable | Non applicable         | Ponta Negra beach | 2017 | 96  | 4     | 0.5   | 0.5  | 0.06  |
| 1486/2017   | Brazil   | Natal          | Non applicable | Non applicable         | Ponta Negra beach | 2017 | 96  | 4     | 0.25  | 0.5  | 0.06  |
| 1491/2017   | Brazil   | Natal          | Non applicable | Non applicable         | Ponta Negra beach | 2017 | 96  | 4     | 0.25  | 1    | 0.06  |
| 1498/2017   | Brazil   | Natal          | Non applicable | Non applicable         | Ponta Negra beach | 2017 | 96  | 2     | 0.25  | 0.5  | 0.06  |
| 1468/2017   | Brazil   | Natal          | Non applicable | Non applicable         | Ponta Negra beach | 2017 | 97  | 4     | 0.25  | 0.5  | 0.06  |
| 1471/2017   | Brazil   | Natal          | Non applicable | Non applicable         | Ponta Negra beach | 2017 | 97  | 4     | 0.25  | 1    | 0.06  |
| 1488/2017   | Brazil   | Natal          | Non applicable | Non applicable         | Ponta Negra beach | 2017 | 97  | 2     | 0.25  | 1    | 0.06  |
| 365/2015    | Brazil   | São Paulo      | 3              | IU peritoneal dialysis | Blood culture     | 2015 | 98  | 2     | 0.125 | 0.5  | 0.06  |
| 728/2019    | Brazil   | Porto Alegre   | 9              | Medical ICU            | Blood culture     | 2018 | 99  | 0.125 | 0.03  | 0.5  | 0.03  |
| 1760E0/2017 | Brazil   | Rio de Janeiro | 12             | Unknown                | Blood culture     | 2017 | 100 | 0.25  | 0.06  | 0.5  | 0.03  |
| 1887/2021   | Brazil   | São Paulo      | 3              | General ICU adult      | Blood culture     | 2021 | 100 | 0.125 | 0.03  | 0.5  | 0.03  |
| CMRP5553    | Brazil   | Curitiba       | 2              | Unknown                | Blood culture     | 2022 | 101 | 0.25  | 0.03  | 0.25 | 0.03  |
| 158/2019    | Brazil   | São Paulo      | 18             | Unknown                | Blood culture     | 2019 | 102 | 0.125 | 0.03  | 1    | 0.06  |

|             |        |                |    |                                  |                |      |     |       |       |       |      |
|-------------|--------|----------------|----|----------------------------------|----------------|------|-----|-------|-------|-------|------|
| 1414A/2017  | Brazil | Cascavel       | 25 | Unknown                          | Blood culture  | 2016 | 103 | 0.125 | 0.03  | 0.5   | 0.03 |
| 1750A0/2017 | Brazil | Rio de Janeiro | 12 | Unknown                          | Blood culture  | 2015 | 104 | 0.125 | 0.03  | 0.5   | 0.03 |
| 1750C0/2017 | Brazil | Rio de Janeiro | 12 | Unknown                          | Blood culture  | 2015 | 104 | 0.125 | 0.03  | 0.5   | 0.06 |
| CMRP5543    | Brazil | Curitiba       | 2  | Unknown                          | Blood culture  | 2022 | 105 | 0.25  | 0.03  | 0.25  | 0.06 |
| CMRP5549    | Brazil | Curitiba       | 2  | Unknown                          | Blood culture  | 2022 | 106 | 0.125 | 0.03  | 0.5   | 0.03 |
| 1272/2016   | Brazil | São Paulo      | 18 | Unknown                          | Blood culture  | 2016 | 107 | 0.25  | 0.03  | 0.5   | 0.03 |
| 1270/2016   | Brazil | São Paulo      | 18 | Unknown                          | Blood culture  | 2016 | 107 | 0.125 | 0.03  | 0.5   | 0.03 |
| 645/2019    | Brazil | São Paulo      | 18 | General ICU                      | Blood culture  | 2017 | 107 | 0.125 | 0.03  | 0.5   | 0.03 |
| 652/2019    | Brazil | São Paulo      | 18 | Surgical nursery                 | Blood culture  | 2018 | 107 | 0.125 | 0.03  | 0.25  | 0.06 |
| 1879/2021   | Brazil | São Paulo      | 3  | General ICU adult III            | Blood culture  | 2021 | 107 | 0.125 | 0.03  | 0.5   | 0.03 |
| 426/2019    | Brazil | São Paulo      | 19 | Unknown                          | Blood culture  | 2019 | 108 | 0.125 | 0.03  | 0.5   | 0.03 |
| 8095/2011   | Brazil | São Paulo      | 24 | General ICU                      | Blood culture  | 2011 | 109 | 4     | 0.125 | 0.5   | 0.06 |
| 9253/2013   | Brazil | São Paulo      | 26 | Unknown                          | Blood culture  | 2013 | 110 | 8     | 0.5   | 1     | 0.06 |
| 681/2019    | Brazil | São Paulo      | 27 | Pediatric ICU                    | Blood culture  | 2018 | 111 | 8     | 0.5   | 1     | 0.03 |
| 683/2019    | Brazil | São Paulo      | 27 | Pediatric ICU                    | Blood culture  | 2018 | 111 | 8     | 1     | 0.5   | 0.03 |
| 1541/2020   | Brazil | Salvador       | 3  | IU semi intensive BMT            | Blood culture  | 2019 | 111 | 8     | 0.5   | 1     | 0.03 |
| 2116/2021   | Brazil | São Paulo      | 6  | Unknown                          | Catheter blood | 2021 | 111 | 0.25  | 0.03  | 0.125 | 0.03 |
| 2118/2021   | Brazil | São Paulo      | 6  | Unknown                          | Blood culture  | 2021 | 111 | 0.25  | 0.03  | 0.5   | 0.03 |
| 2128/2021   | Brazil | São Paulo      | 6  | Unknown                          | Catheter blood | 2021 | 111 | 0.125 | 0.03  | 0.5   | 0.03 |
| 822/2015    | Brazil | São Paulo      | 3  | ICU first aid                    | Blood culture  | 2015 | 112 | 8     | 1     | 0.5   | 0.06 |
| 1743/2017   | Brazil | Rio de Janeiro | 12 | Unknown                          | Blood culture  | 2017 | 112 | 8     | 0.5   | 0.5   | 0.03 |
| 1535/2017   | Brazil | Salvador       | 3  | Unknown                          | Blood culture  | 2017 | 113 | 8     | 0.5   | 0.5   | 0.03 |
| 1034/2020   | Brazil | São Paulo      | 18 | Unknown                          | Catheter blood | 2020 | 114 | 0.25  | 0.03  | 0.5   | 0.03 |
| 1086/2020   | Brazil | São Paulo      | 18 | Unknown                          | Blood culture  | 2020 | 114 | 0.25  | 0.03  | 0.125 | 0.03 |
| 1540/2020   | Brazil | Salvador       | 3  | IU semi intensive BMT            | Blood culture  | 2019 | 115 | 8     | 0.5   | 1     | 0.03 |
| 1534/2017   | Brazil | Salvador       | 3  | Unknown                          | Blood culture  | 2017 | 116 | 8     | 0.5   | 0.5   | 0.03 |
| 7553/2011   | Brazil | Curitiba       | 28 | Medical clinic                   | Catheter blood | 2010 | 117 | 0.25  | 0.03  | 0.5   | 0.03 |
| 7564/2011   | Brazil | São Paulo      | 11 | Orthopedics                      | Blood culture  | 2011 | 117 | 0.25  | 0.03  | 0.5   | 0.03 |
| 1833/2021   | Brazil | São Paulo      | 3  | IU gastroclinic                  | Blood culture  | 2020 | 118 | 0.125 | 0.03  | 0.25  | 0.03 |
| 1834/2021   | Brazil | São Paulo      | 3  | IU gastroclinic                  | Catheter blood | 2020 | 118 | 0.125 | 0.03  | 0.5   | 0.03 |
| 6926/2010   | Brazil | Salvador       | 3  | Pediatric ICU                    | Blood culture  | 2010 | 119 | 0.125 | 0.03  | 0.5   | 0.03 |
| 251/2019    | Brazil | São Paulo      | 19 | Unknown                          | Blood culture  | 2018 | 120 | 0.25  | 0.03  | 0.5   | 0.03 |
| 401/2015    | Brazil | São Paulo      | 3  | ICU adult first aid              | Blood culture  | 2015 | 121 | 0.25  | 0.03  | 0.5   | 0.03 |
| 10101/2014  | Brazil | São Paulo      | 3  | Observation unit adult first aid | Catheter blood | 2014 | 122 | 0.5   | 0.03  | 0.5   | 0.03 |
| 10102/2014  | Brazil | São Paulo      | 3  | Observation unit adult first aid | Blood culture  | 2014 | 122 | 0.5   | 0.03  | 0.5   | 0.03 |
| 1910/2017   | Brazil | São Paulo      | 18 | Unknown                          | Blood culture  | 2017 | 123 | 0.125 | 0.03  | 0.5   | 0.03 |
| 10177/2014  | Brazil | São Paulo      | 3  | ICU pediatrics                   | Blood culture  | 2014 | 124 | 0.125 | 0.03  | 0.5   | 0.03 |
| 10/2015     | Brazil | São Paulo      | 3  | ICU pediatrics                   | Blood culture  | 2014 | 124 | 0.25  | 0.06  | 0.5   | 0.03 |
| CMRP5545    | Brazil | Curitiba       | 2  | Unknown                          | Blood culture  | 2022 | 125 | 0.5   | 0.03  | 0.125 | 0.06 |
| 1243/2020   | Brazil | São Paulo      | 3  | Observation unit adult first aid | Blood culture  | 2020 | 126 | 0.25  | 0.03  | 0.5   | 0.06 |
| 7171/2010   | LATAM  | Unknown        | 29 | Unknown                          | Blood culture  | 2010 | 127 | 0.25  | 0.03  | 1     | 0.06 |
| 613/2019    | Brazil | São Paulo      | 19 | Unknown                          | Blood culture  | 2018 | 128 | 0.25  | 0.03  | 0.5   | 0.03 |
| 498/2019    | Brazil | São Paulo      | 13 | Clinical nursery                 | Blood culture  | 2017 | 129 | 0.25  | 0.03  | 0.25  | 0.03 |
| 555/2019    | Brazil | São Paulo      | 19 | General ICU                      | Blood culture  | 2018 | 130 | 0.25  | 0.03  | 0.5   | 0.03 |
| 583/2019    | Brazil | São Paulo      | 19 | General ICU                      | Blood culture  | 2018 | 130 | 0.25  | 0.03  | 0.5   | 0.03 |
| 584/2019    | Brazil | São Paulo      | 19 | General ICU                      | Blood culture  | 2018 | 130 | 0.25  | 0.03  | 0.25  | 0.03 |
| 6876A/2010  | Brazil | Rio de Janeiro | 15 | Unknown                          | Blood culture  | 2010 | 131 | 0.125 | 0.03  | 0.5   | 0.03 |
| 750/2019    | Brazil | Porto Alegre   | 4  | General ICU                      | Blood culture  | 2018 | 132 | 0.125 | 0.03  | 0.5   | 0.03 |
| 751/2019    | Brazil | Porto Alegre   | 4  | General ICU                      | Blood culture  | 2018 | 132 | 0.125 | 0.03  | 0.5   | 0.03 |
| 155/2018    | Brazil | São Paulo      | 19 | ICU emergency room adult         | Catheter blood | 2018 | 133 | 0.125 | 0.03  | 0.5   | 0.03 |
| CMRP5541    | Brazil | Curitiba       | 2  | Unknown                          | Blood culture  | 2022 | 134 | 0.25  | 0.03  | 0.125 | 0.06 |
| 6876B/2010  | Brazil | Rio de Janeiro | 15 | Unknown                          | Blood culture  | 2010 | 135 | 0.125 | 0.03  | 0.5   | 0.03 |
| 216/2019    | Brazil | São Paulo      | 19 | General ICU                      | Blood culture  | 2018 | 136 | 0.125 | 0.03  | 0.5   | 0.03 |

|             |        |                |    |                          |                |      |     |       |       |      |      |
|-------------|--------|----------------|----|--------------------------|----------------|------|-----|-------|-------|------|------|
| 612/2019    | Brazil | São Paulo      | 19 | General ICU              | Blood culture  | 2018 | 137 | 0.25  | 0.03  | 0.25 | 0.03 |
| 701/2019    | Brazil | São Paulo      | 27 | Unknown                  | Blood culture  | 2018 | 138 | 0.125 | 0.03  | 0.5  | 0.03 |
| 703/2019    | Brazil | São Paulo      | 27 | Unknown                  | Blood culture  | 2018 | 139 | 0.25  | 0.03  | 0.25 | 0.03 |
| 8094/2011   | Brazil | São Paulo      | 24 | ICU                      | Blood culture  | 2011 | 140 | 0.25  | 0.03  | 0.5  | 0.03 |
| 685/2019    | Brazil | São Paulo      | 27 | Surgical nursery         | Catheter blood | 2017 | 141 | 0.125 | 0.03  | 0.25 | 0.03 |
| 102/2019    | Brazil | Rio de Janeiro | 15 | Unknown                  | Blood culture  | 2017 | 142 | 0.125 | 0.03  | 0.5  | 0.03 |
| 730/2019    | Brazil | Porto Alegre   | 4  | General ICU              | Catheter blood | 2018 | 143 | 0.125 | 0.03  | 0.5  | 0.03 |
| 99/2019     | Brazil | São Paulo      | 3  | General ICU              | Blood culture  | 2017 | 144 | 0.125 | 0.03  | 0.5  | 0.03 |
| 101/2019    | Brazil | São Paulo      | 19 | General ICU              | Blood culture  | 2017 | 144 | 0.125 | 0.03  | 0.5  | 0.03 |
| 1556/2017   | Brazil | Londrina       | 1  | Unknown                  | Blood culture  | 2017 | 145 | 0.125 | 0.03  | 0.25 | 0.03 |
| 1734D0/2017 | Brazil | Rio de Janeiro | 12 | Unknown                  | Blood culture  | 2011 | 146 | 0.125 | 0.03  | 0.5  | 0.03 |
| 1735B0/2017 | Brazil | Rio de Janeiro | 12 | Unknown                  | Blood culture  | 2011 | 146 | 0.125 | 0.03  | 0.5  | 0.03 |
| 6317/2010   | Brazil | São Paulo      | 19 | Unknown                  | Blood culture  | 2010 | 147 | 0.25  | 0.03  | 1    | 0.03 |
| 6395/2010   | Brazil | São Paulo      | 19 | Unknown                  | Blood culture  | 2010 | 147 | 0.25  | 0.03  | 0.5  | 0.03 |
| 985/2019    | Brazil | São Paulo      | 18 | Unknown                  | Catheter blood | 2019 | 148 | 0.125 | 0.03  | 0.5  | 0.03 |
| 1019/2019   | Brazil | São Paulo      | 3  | Medical urgency          | Blood culture  | 2019 | 149 | 0.5   | 0.03  | 0.5  | 0.03 |
| 1023/2019   | Brazil | São Paulo      | 3  | Medical urgency          | Blood culture  | 2019 | 149 | 0.5   | 0.03  | 0.5  | 0.03 |
| 6966/2010   | Brazil | São Paulo      | 3  | Burn unit                | Blood culture  | 2010 | 150 | 0.125 | 0.03  | 1    | 0.03 |
| 8030/2011   | Brazil | Porto Alegre   | 4  | Emergency                | Blood culture  | 2011 | 151 | 0.25  | 0.03  | 0.25 | 0.03 |
| 7393A/2011  | Brazil | Belo Horizonte | 5  | Surgery                  | Blood culture  | 2011 | 152 | 0.125 | 0.03  | 0.5  | 0.03 |
| 1131/2016   | Brazil | Londrina       | 7  | Unknown                  | Catheter blood | 2016 | 153 | 0.5   | 0.06  | 0.5  | 0.03 |
| 1148/2016   | Brazil | Londrina       | 1  | Unknown                  | Blood culture  | 2016 | 154 | 0.125 | 0.03  | 0.25 | 0.03 |
| 1746/2017   | Brazil | Rio de Janeiro | 12 | Unknown                  | Blood culture  | 2015 | 155 | 0.25  | 0.03  | 0.5  | 0.03 |
| 1152/2016   | Brazil | Londrina       | 1  | Unknown                  | Blood culture  | 2016 | 156 | 0.125 | 0.03  | 0.5  | 0.03 |
| 1859/2017   | Brazil | Maringá        | 30 | Unknown                  | Blood culture  | 2017 | 157 | 0.25  | 0.03  | 0.5  | 0.03 |
| 1100/2016   | Brazil | São Paulo      | 19 | ICU emergency room adult | Catheter blood | 2016 | 158 | 1     | 0.125 | 0.5  | 0.03 |
| 1751/2017   | Brazil | Rio de Janeiro | 12 | Unknown                  | Blood culture  | 2015 | 159 | 0.5   | 0.06  | 1    | 1    |
| 303/2015    | Brazil | São Paulo      | 6  | Unknown                  | Blood culture  | 2015 | 160 | 0.25  | 0.03  | 0.5  | 0.03 |
| 566/2015    | Brazil | São Paulo      | 3  | IU cardiology            | Blood culture  | 2015 | 161 | 0.25  | 0.03  | 0.5  | 0.03 |
| 987/2019    | Brazil | São Paulo      | 6  | Unknown                  | Blood culture  | 2019 | 162 | 0.5   | 0.03  | 0.5  | 0.03 |
| 989/2019    | Brazil | São Paulo      | 6  | Unknown                  | Blood culture  | 2019 | 162 | 0.5   | 0.03  | 0.5  | 0.03 |
| CMRP5547    | Brazil | Curitiba       | 2  | Unknown                  | Blood culture  | 2022 | 163 | 0.125 | 0.03  | 0.25 | 0.03 |
| 1423/2020   | Brazil | São Paulo      | 18 | Unknown                  | Catheter blood | 2020 | 164 | 0.125 | 0.03  | 0.5  | 0.03 |
| 1424/2020   | Brazil | São Paulo      | 18 | Unknown                  | Blood culture  | 2020 | 164 | 0.125 | 0.03  | 0.5  | 0.03 |

\* Catheter blood is a blood culture collected via a central venous catheter. Blood culture is blood obtained via a vena puncture.
